# Supplementary material
Source: Springer Nature journal article supplement (https://www.springermedizin.de/resource/supplementary/12950_2012_282_MOESM8_ESM.pdf/9557474)

**Quercetine-IL8**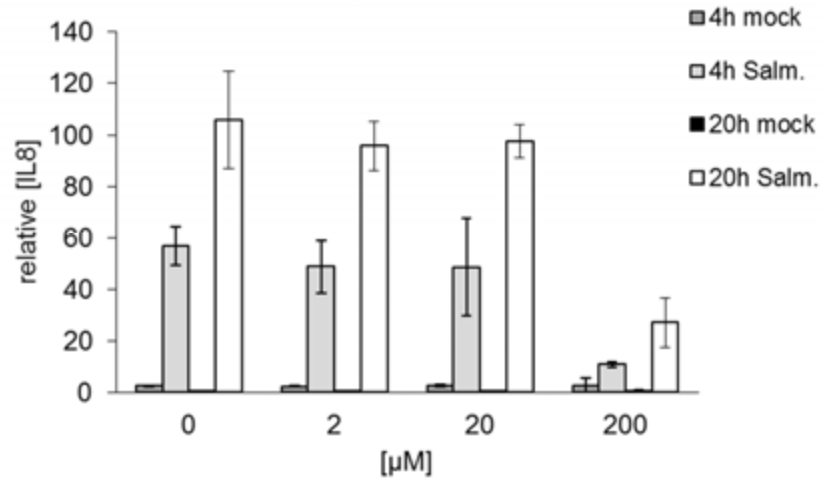**Genistein-IL8**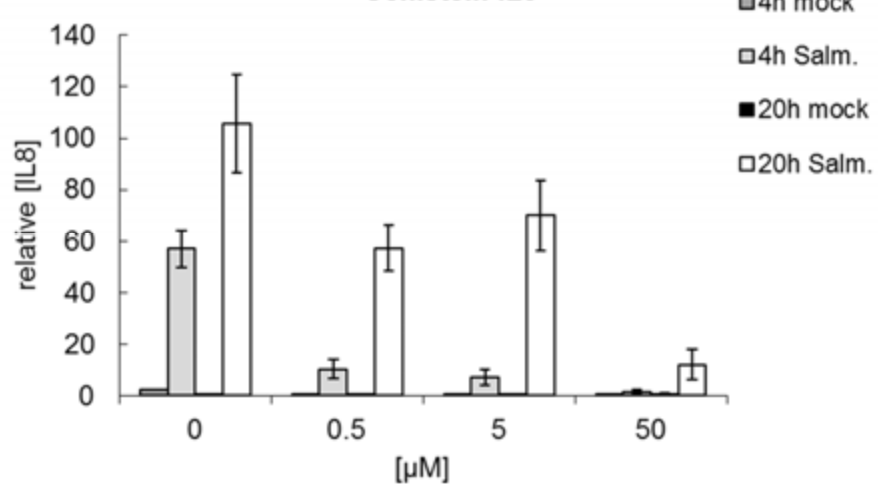

Supplement: MOESM8 [file 9557474]
